# Supplementary material for: Conjugates of Iron-Transporting N-Hydroxylactams with Ciprofloxacin
Source: MDPI journal article supplement (doi:10.3390/molecules27123910), 2022-06-18
Supplement: s1 [file s1]

Supplementary Materials for

**Conjugates of iron-transporting *N*-hydroxylactams with ciprofloxacin**

Olga Bakulina, Anton Bannykh, Ekaterina Levashova and Mikhail Krasavin\*

*Contents*

|                                                        |       |
|--------------------------------------------------------|-------|
| Copies of $^1\text{H}$ and $^{13}\text{C}$ NMR spectra | 2-14  |
| Structures of compounds <b>1a-z</b>                    | 15-16 |
| Bacterial growth graphs (Figure S1)                    | 17    |

# <sup>1</sup>H and <sup>13</sup>C spectra of compound 4

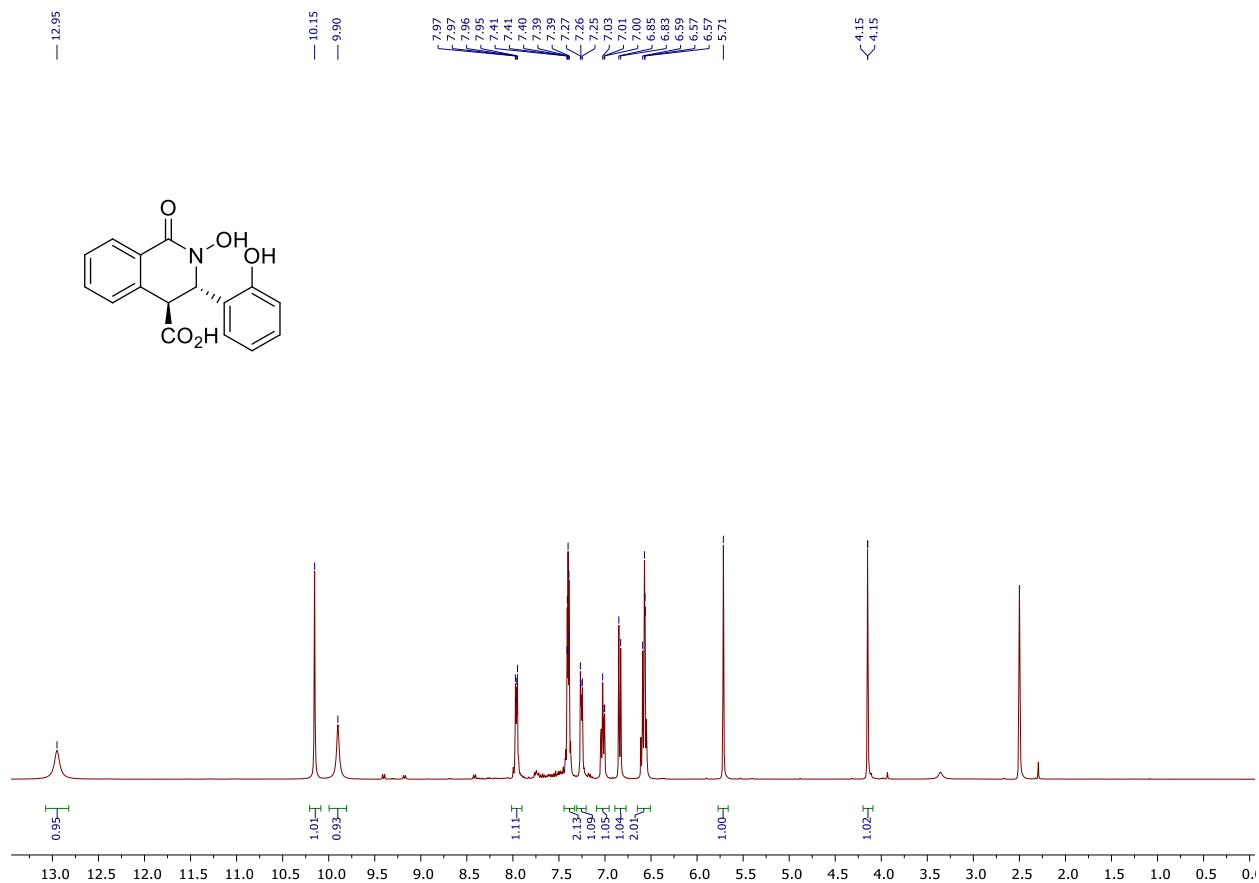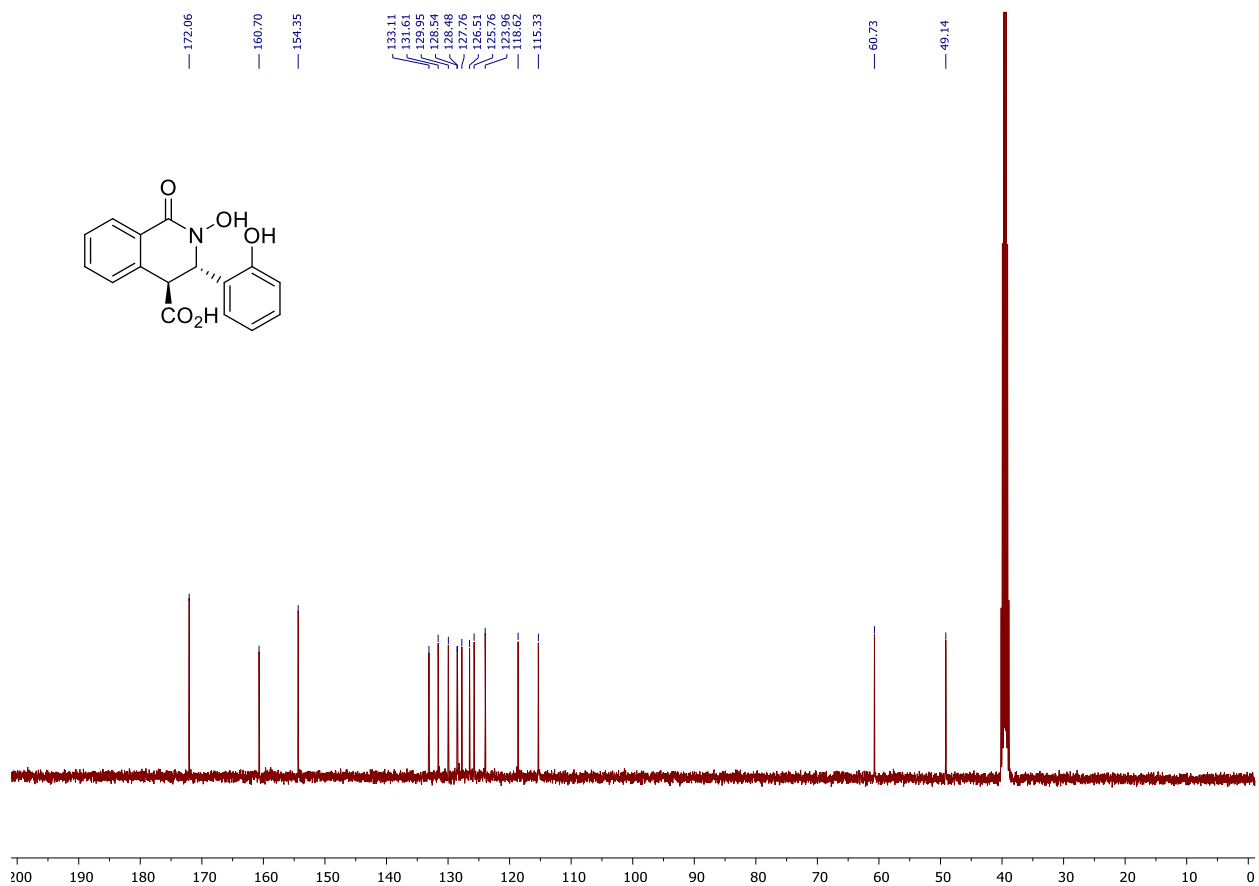

# <sup>1</sup>H and <sup>13</sup>C spectra of compound 5b

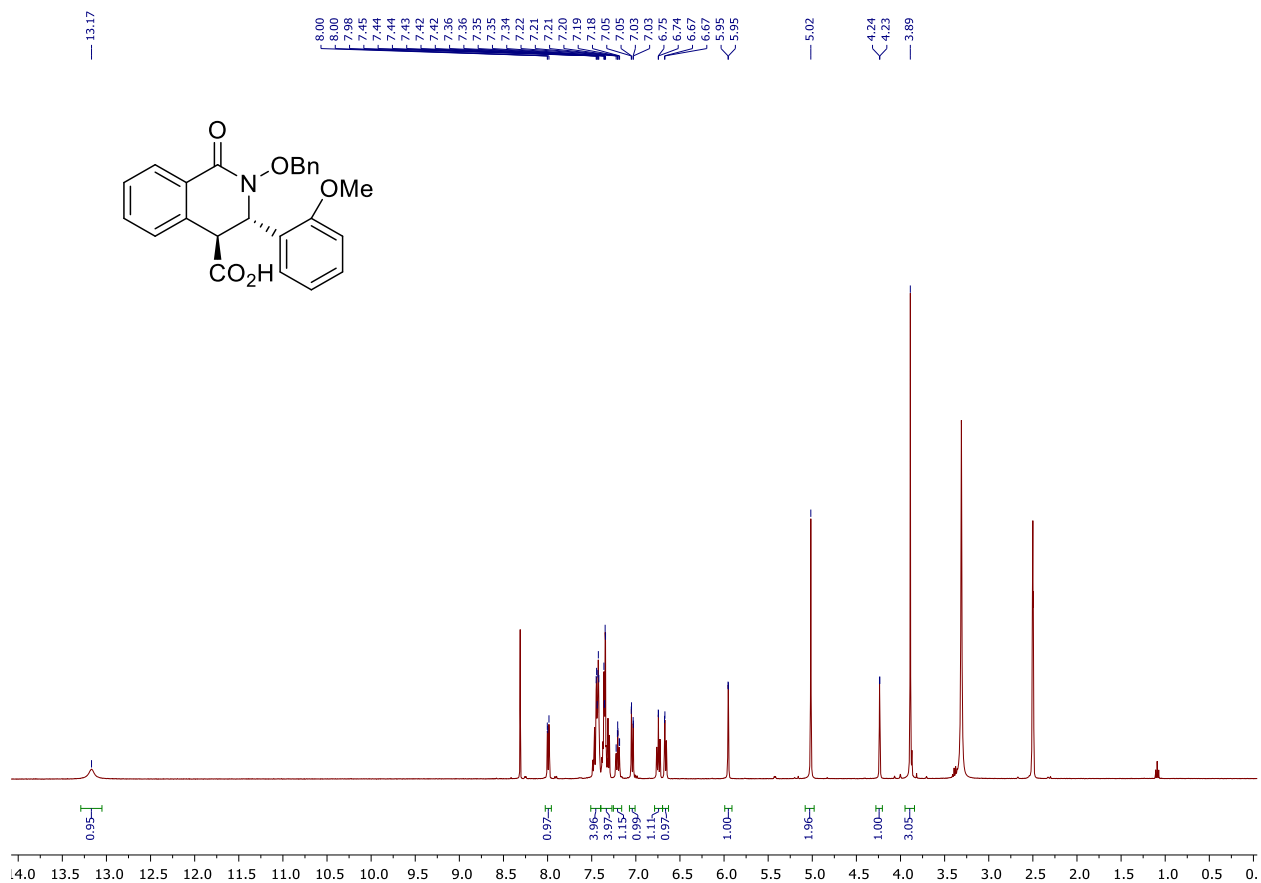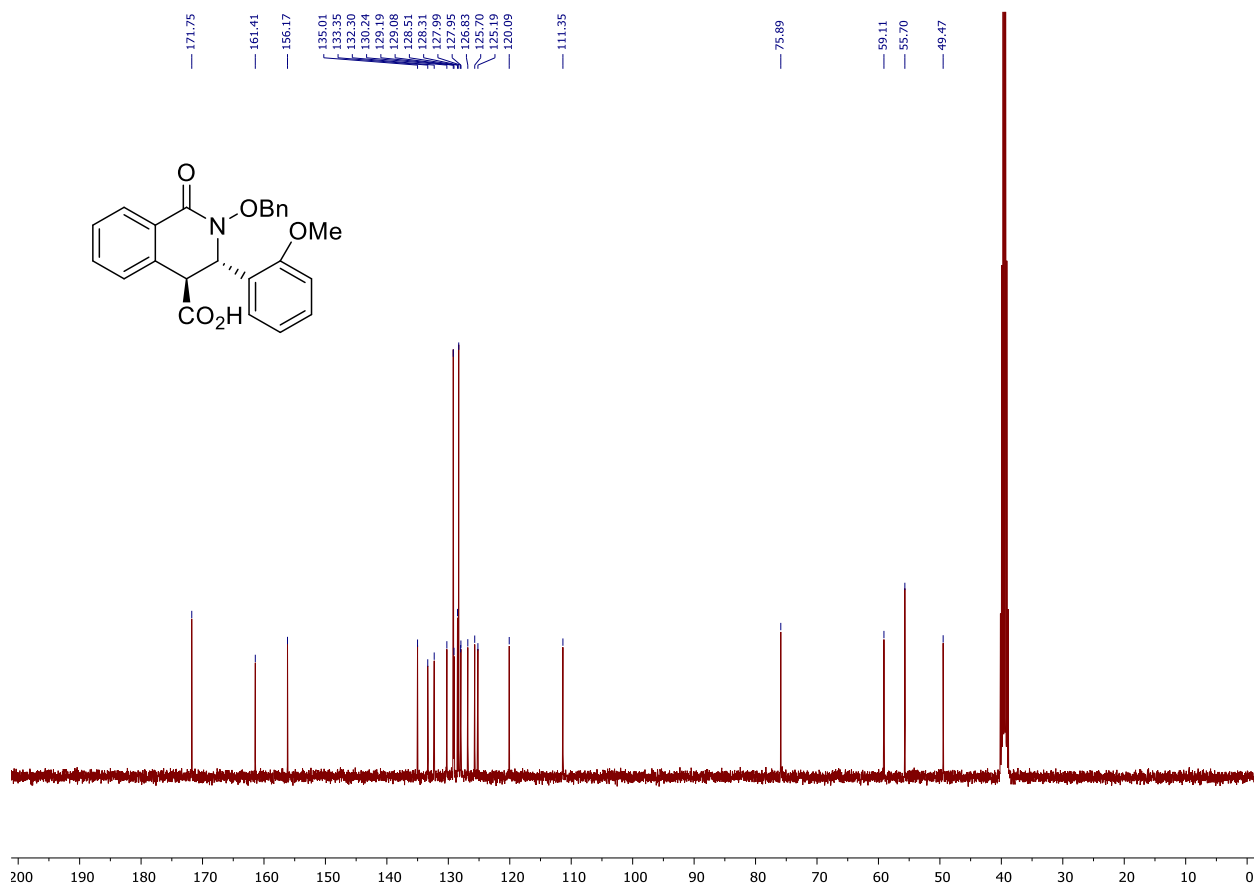

# $^1\text{H}$ and $^{13}\text{C}$ spectra of compound 5c

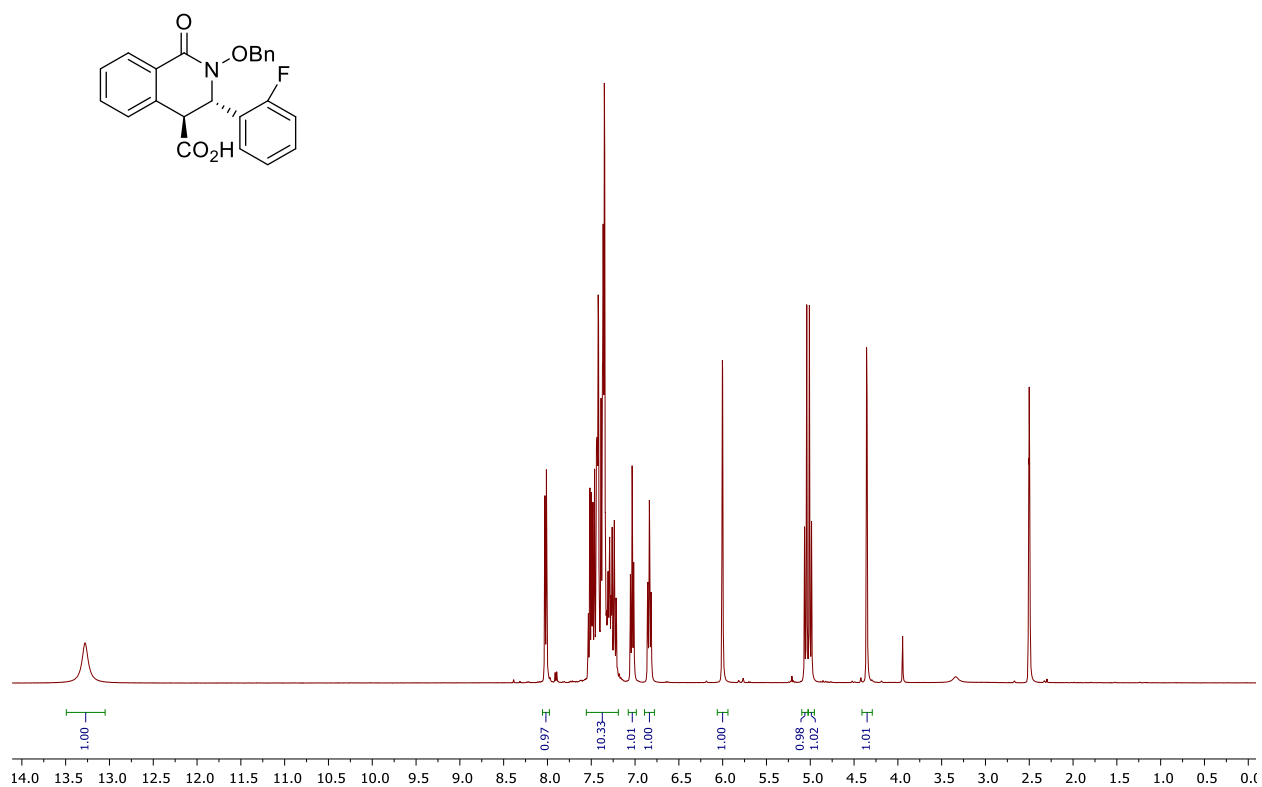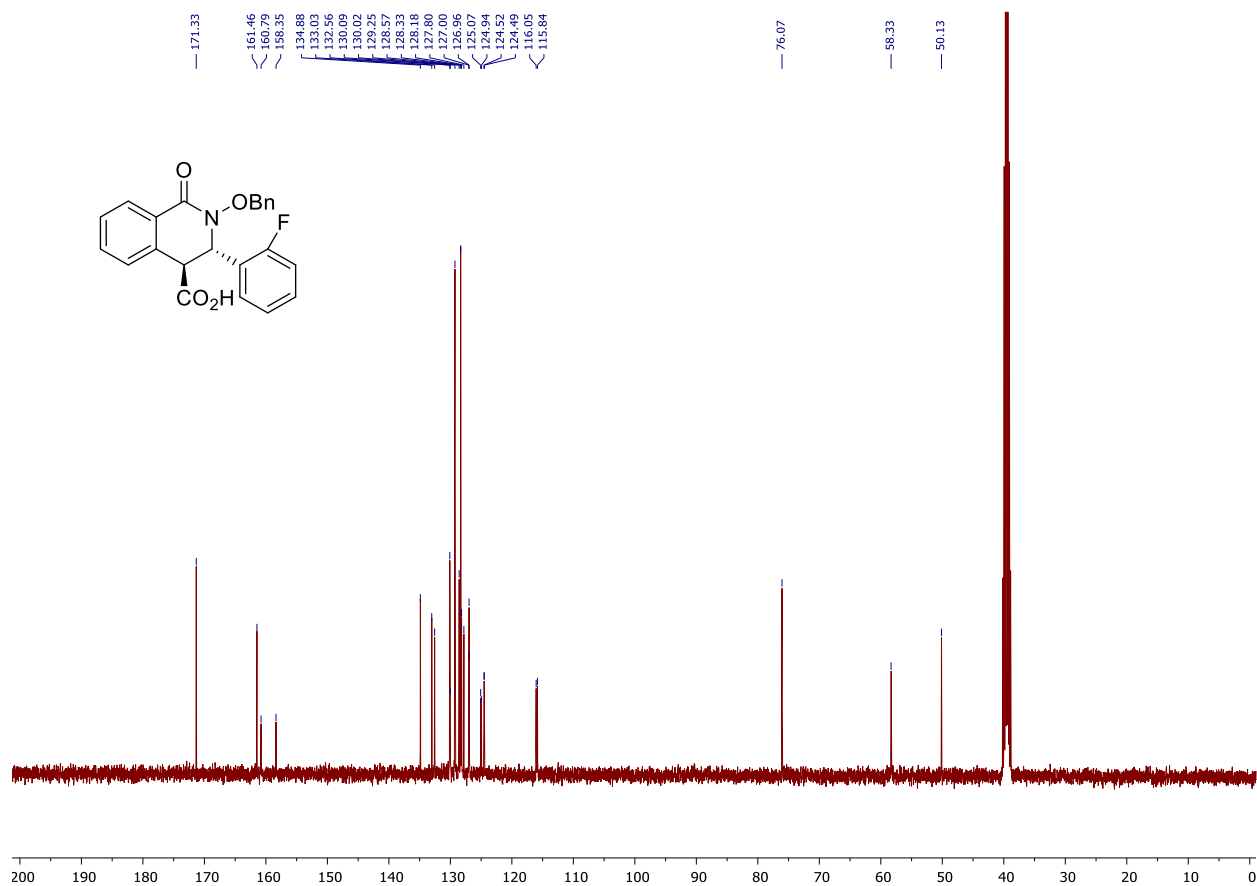

# <sup>1</sup>H and <sup>13</sup>C spectra of compound 6a

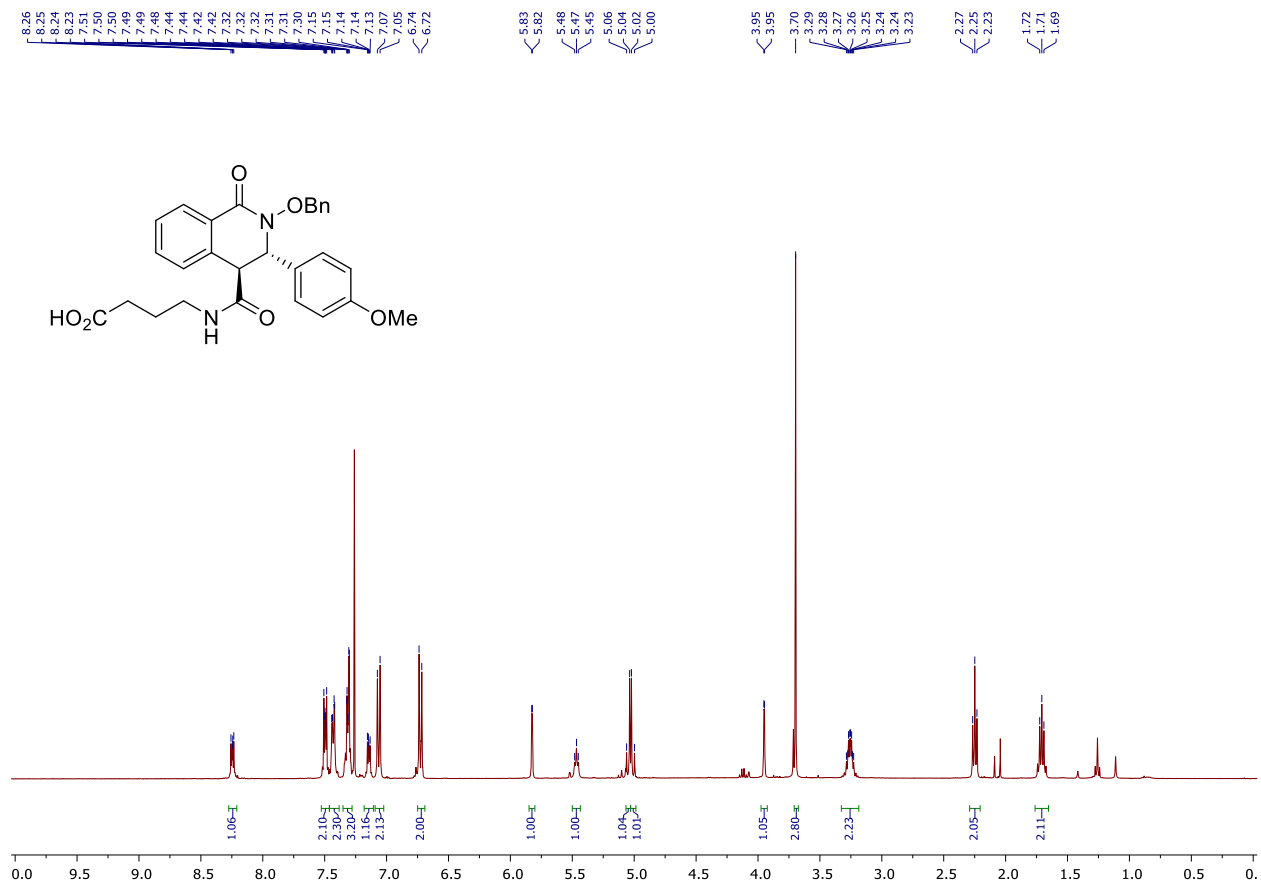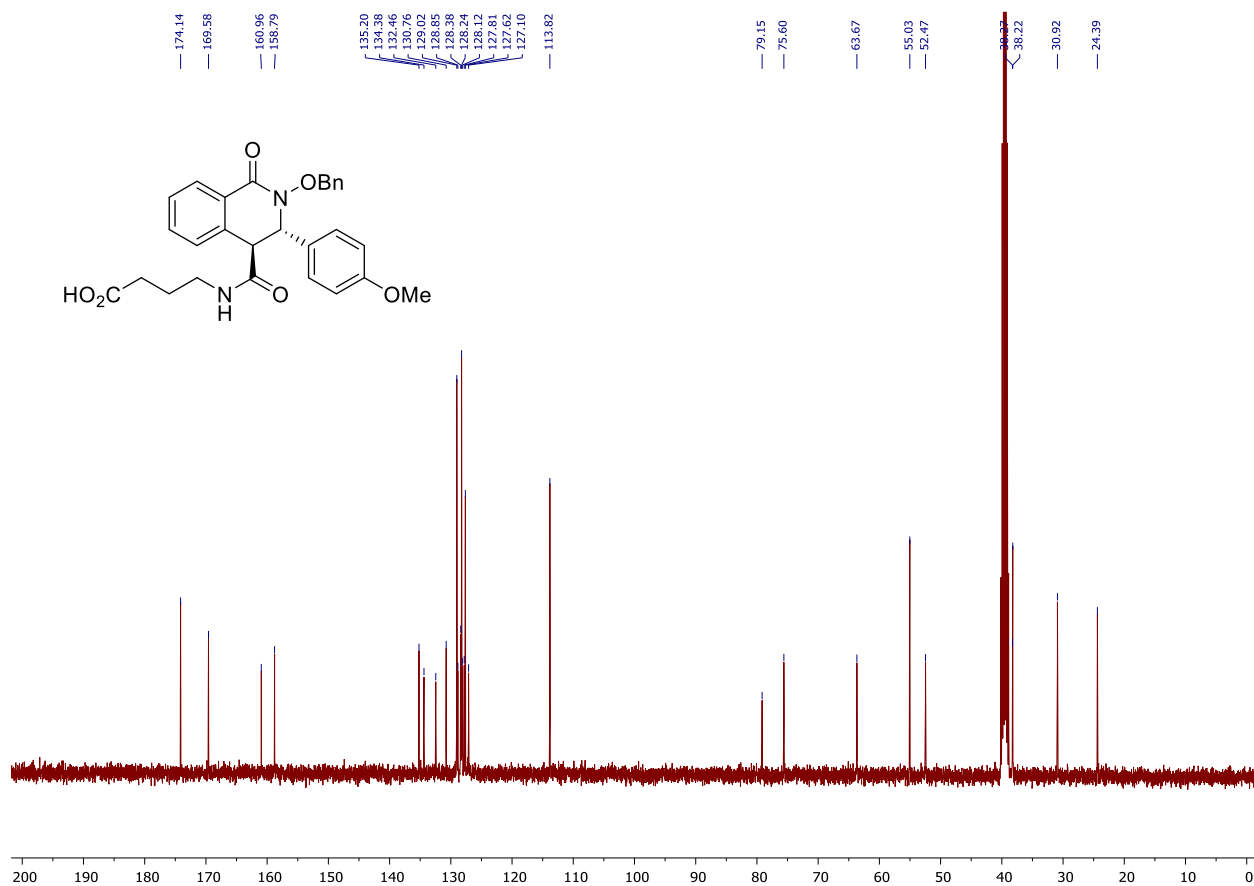

# <sup>1</sup>H and <sup>13</sup>C spectra of compound 6b

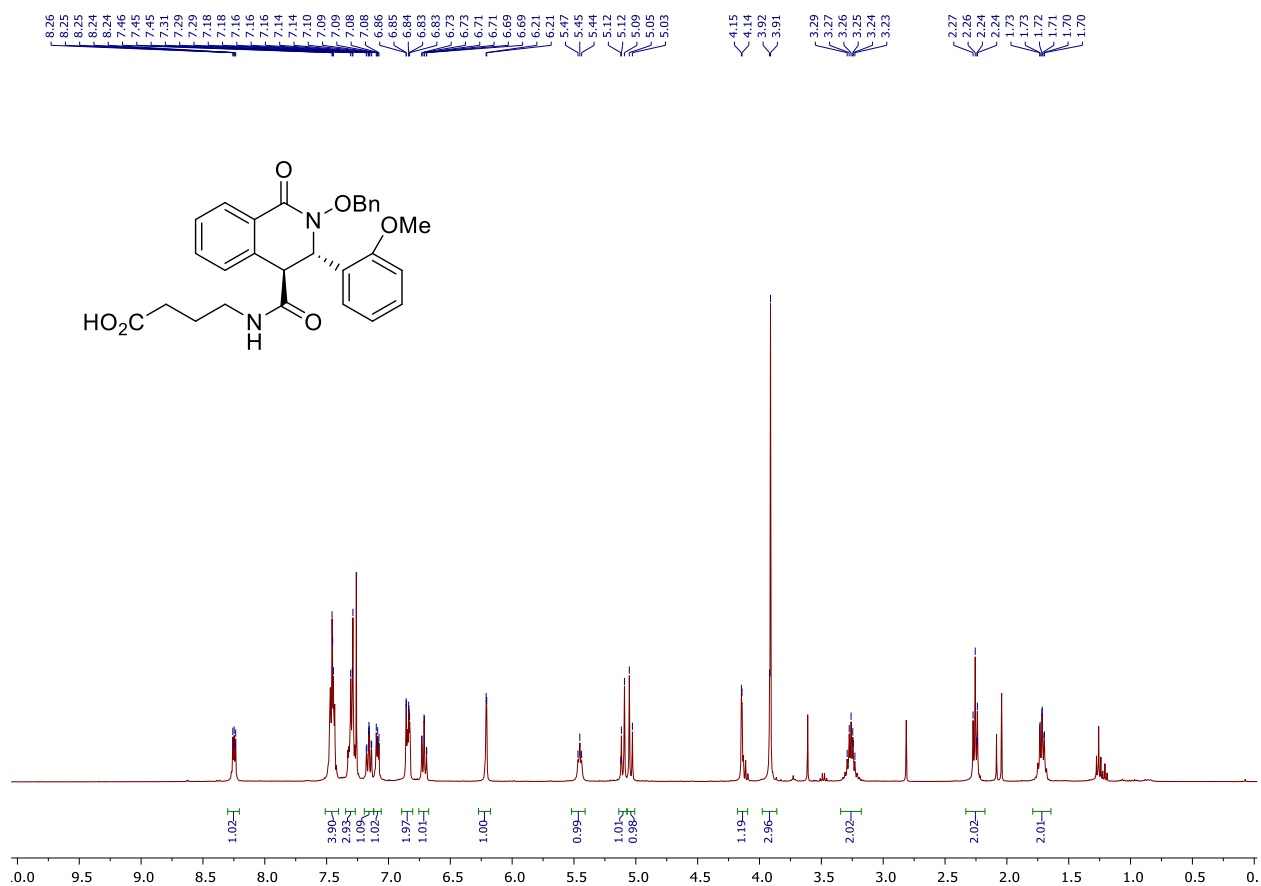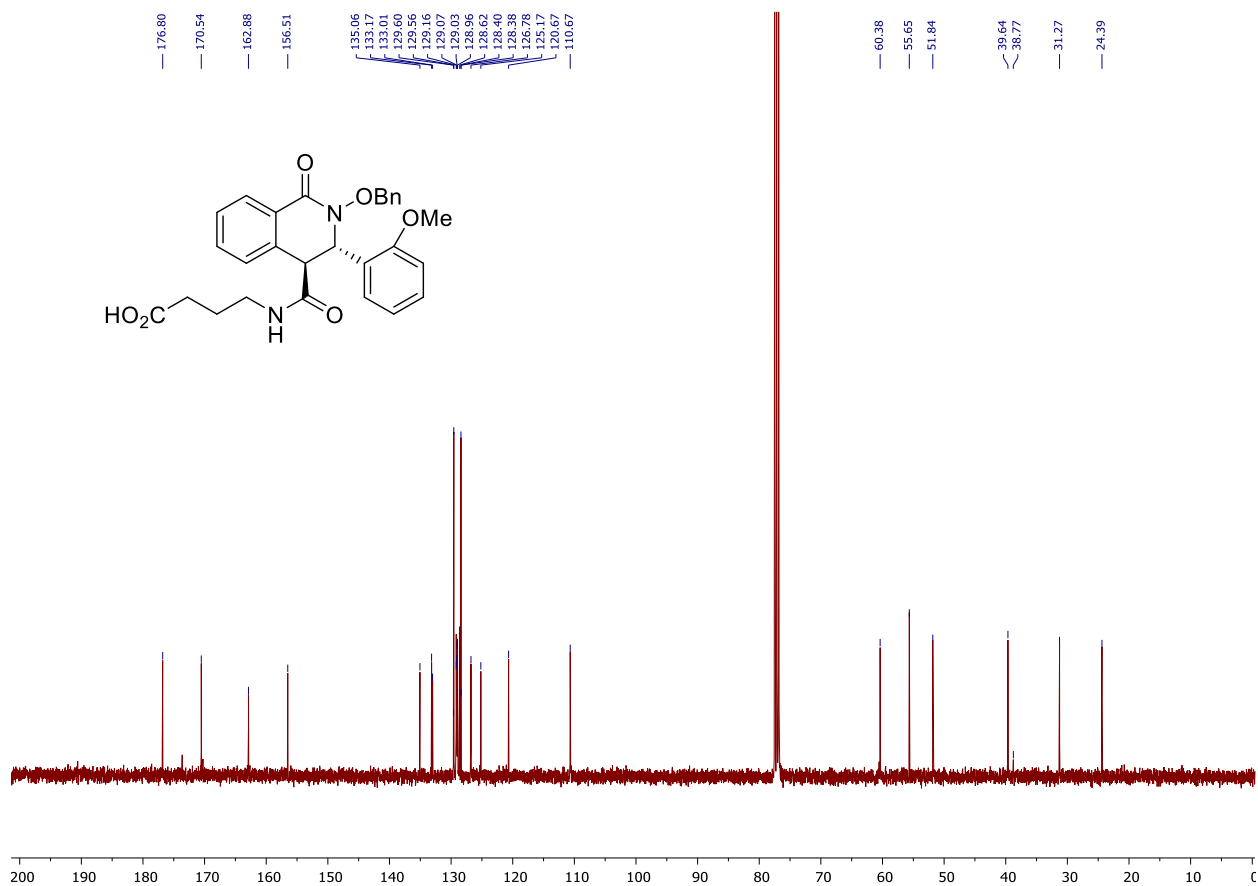

# <sup>1</sup>H and <sup>13</sup>C spectra of compound 6c

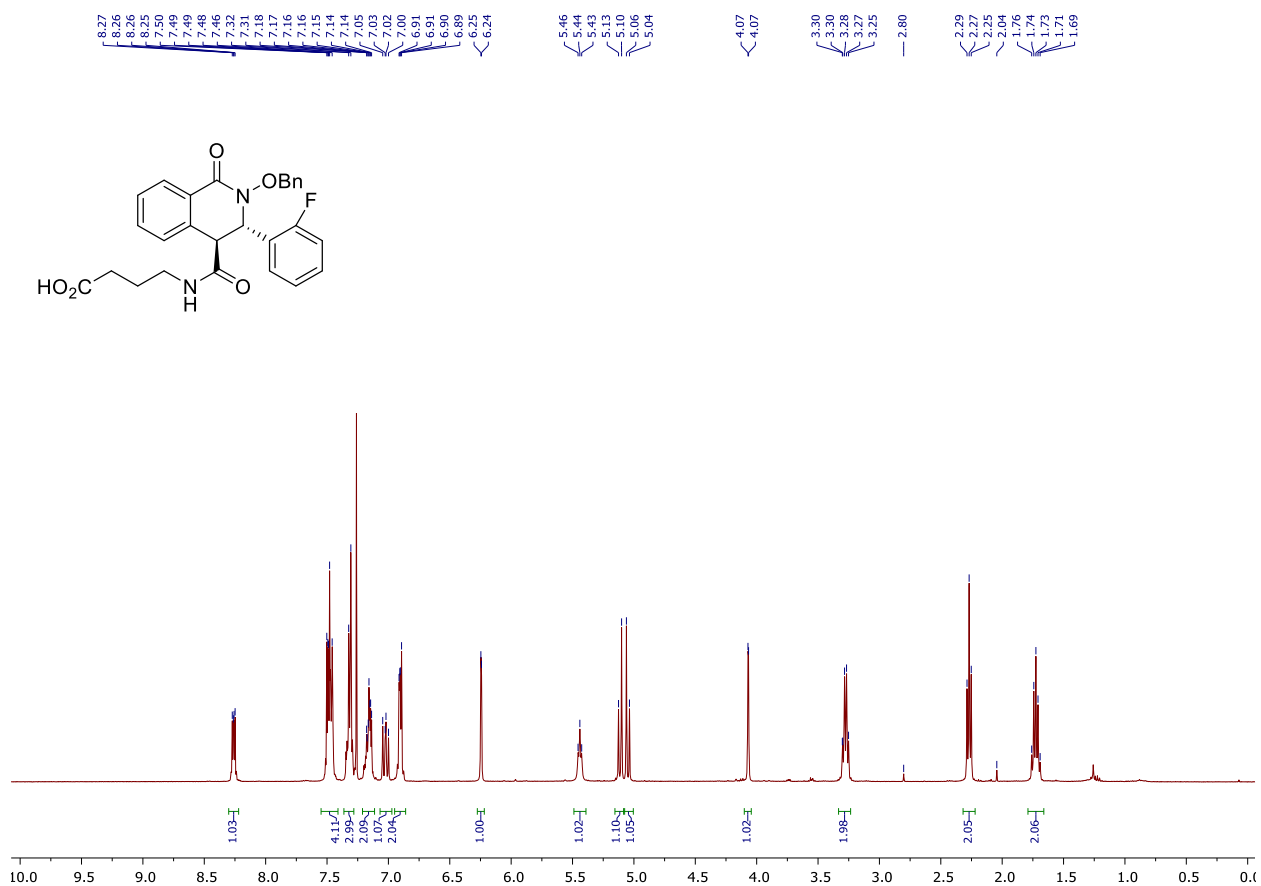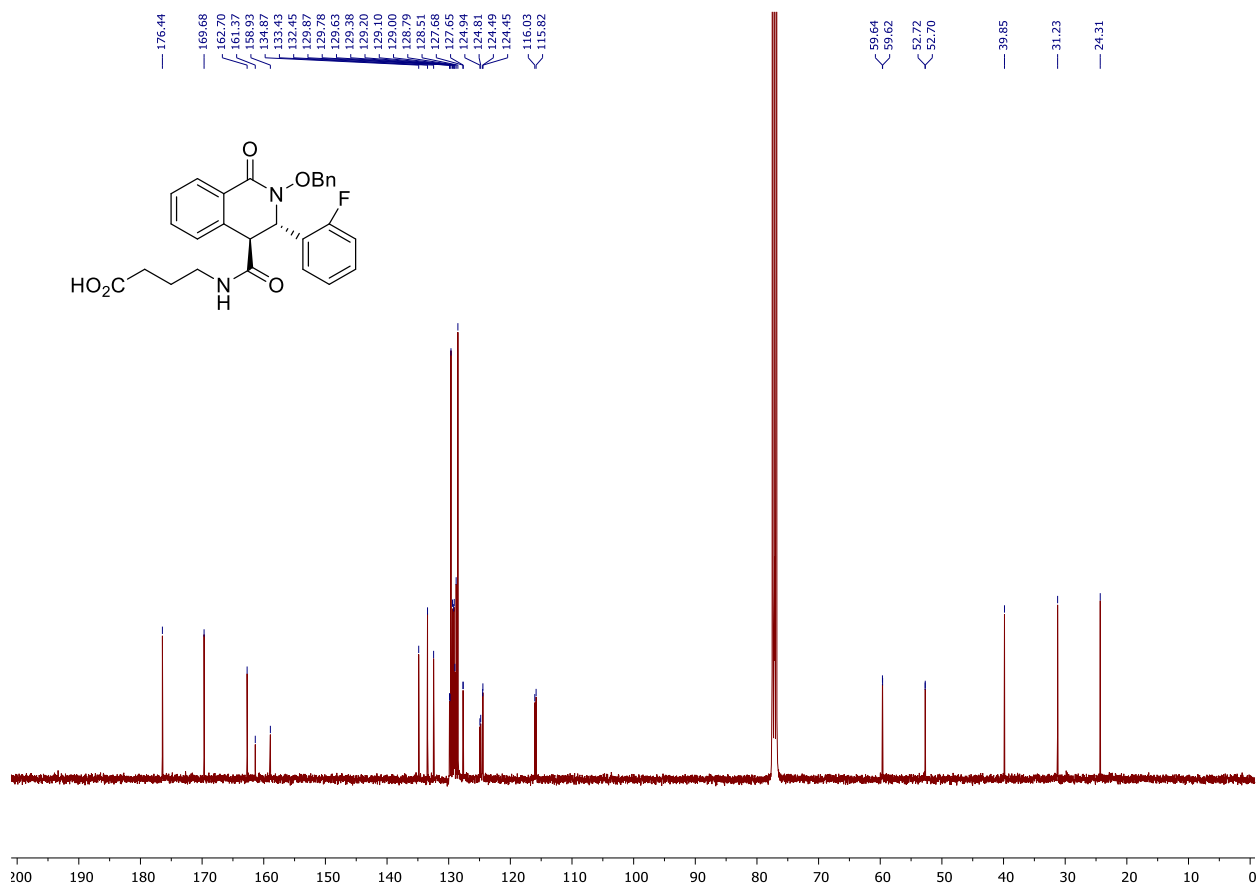

# <sup>1</sup>H and <sup>13</sup>C spectra of compound 7a

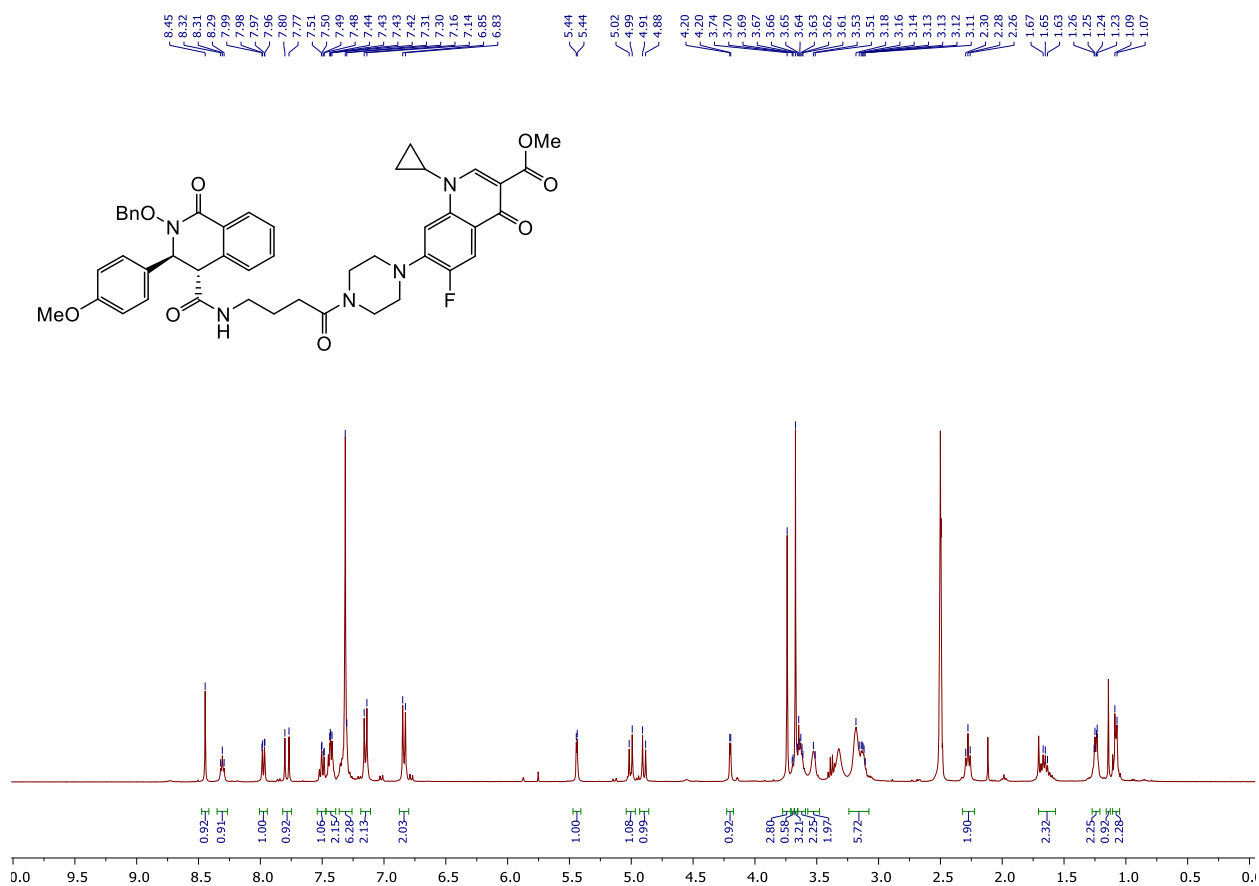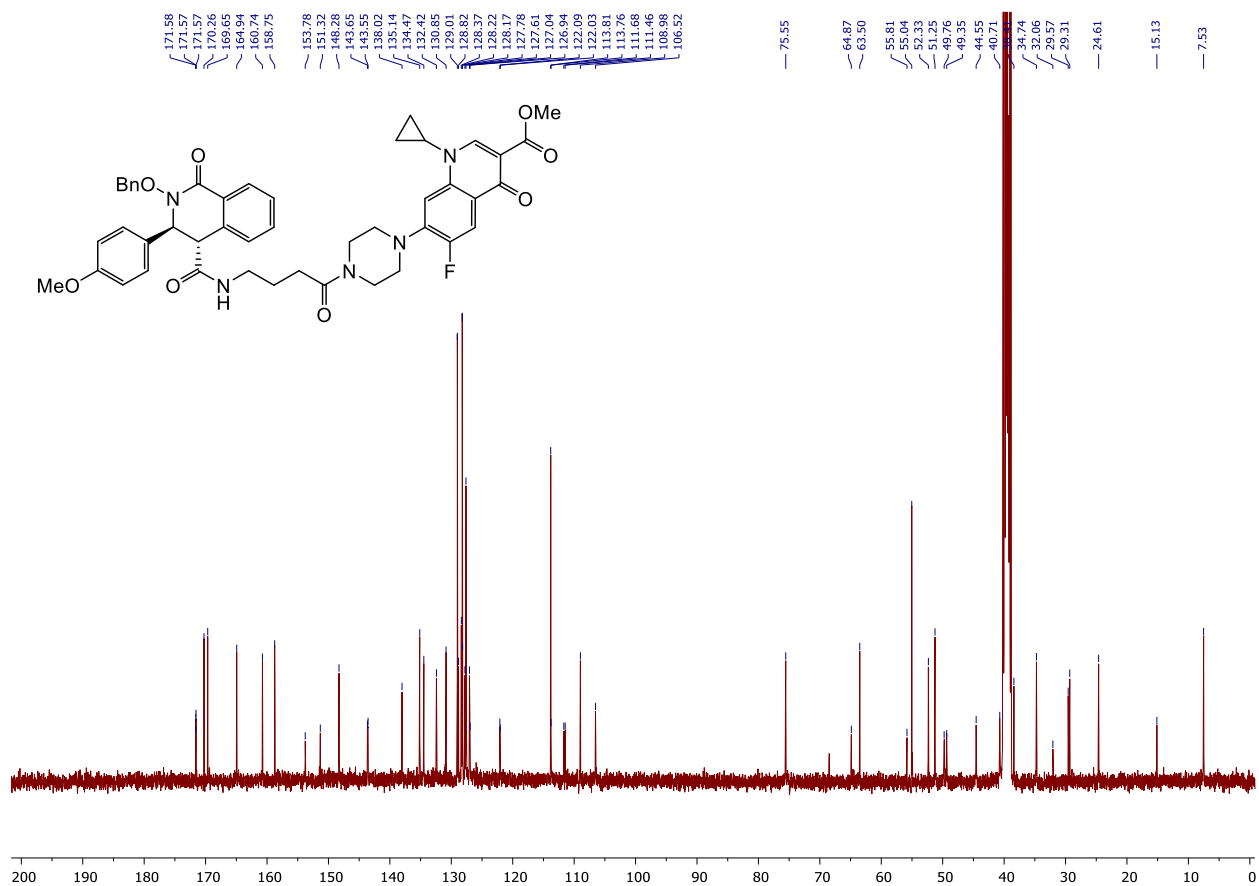



# <sup>1</sup>H and <sup>13</sup>C spectra of compound 7b

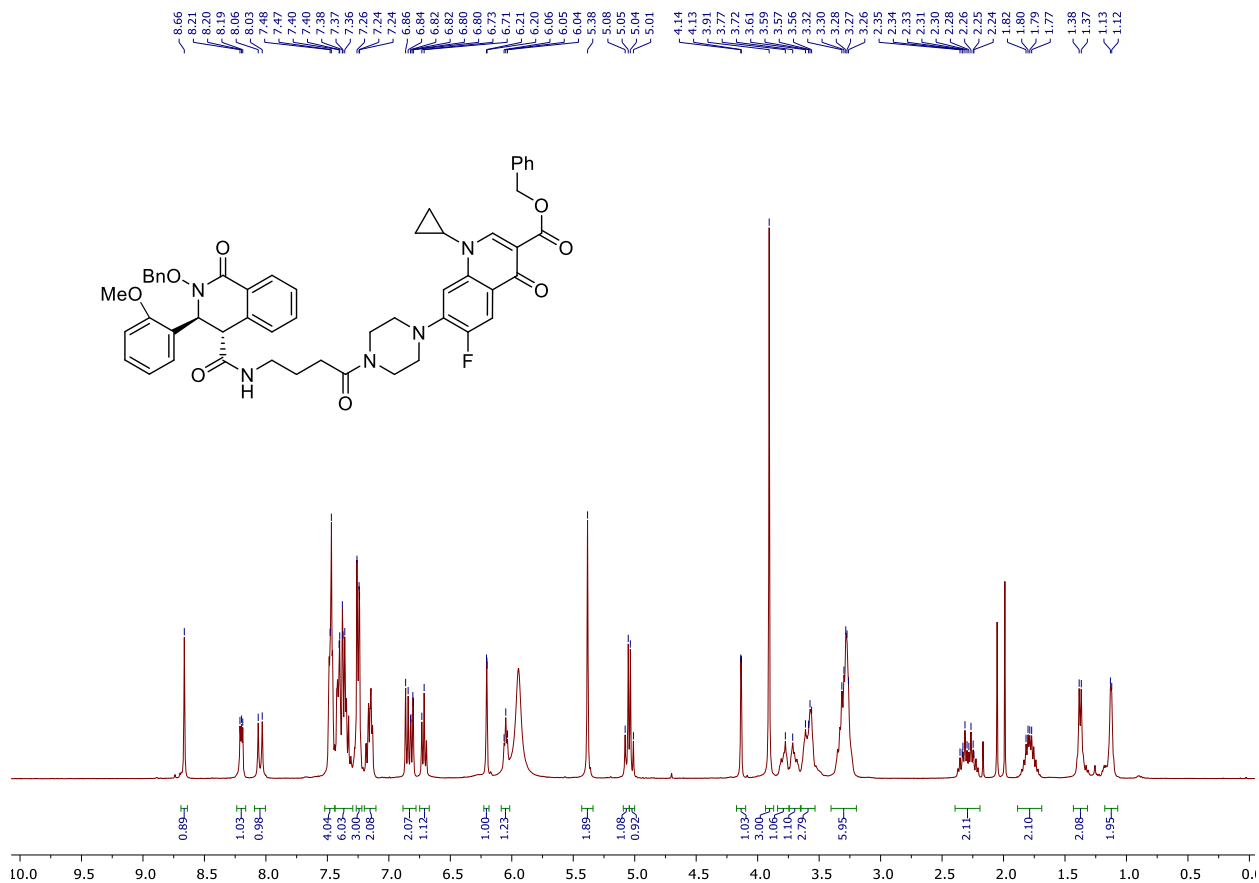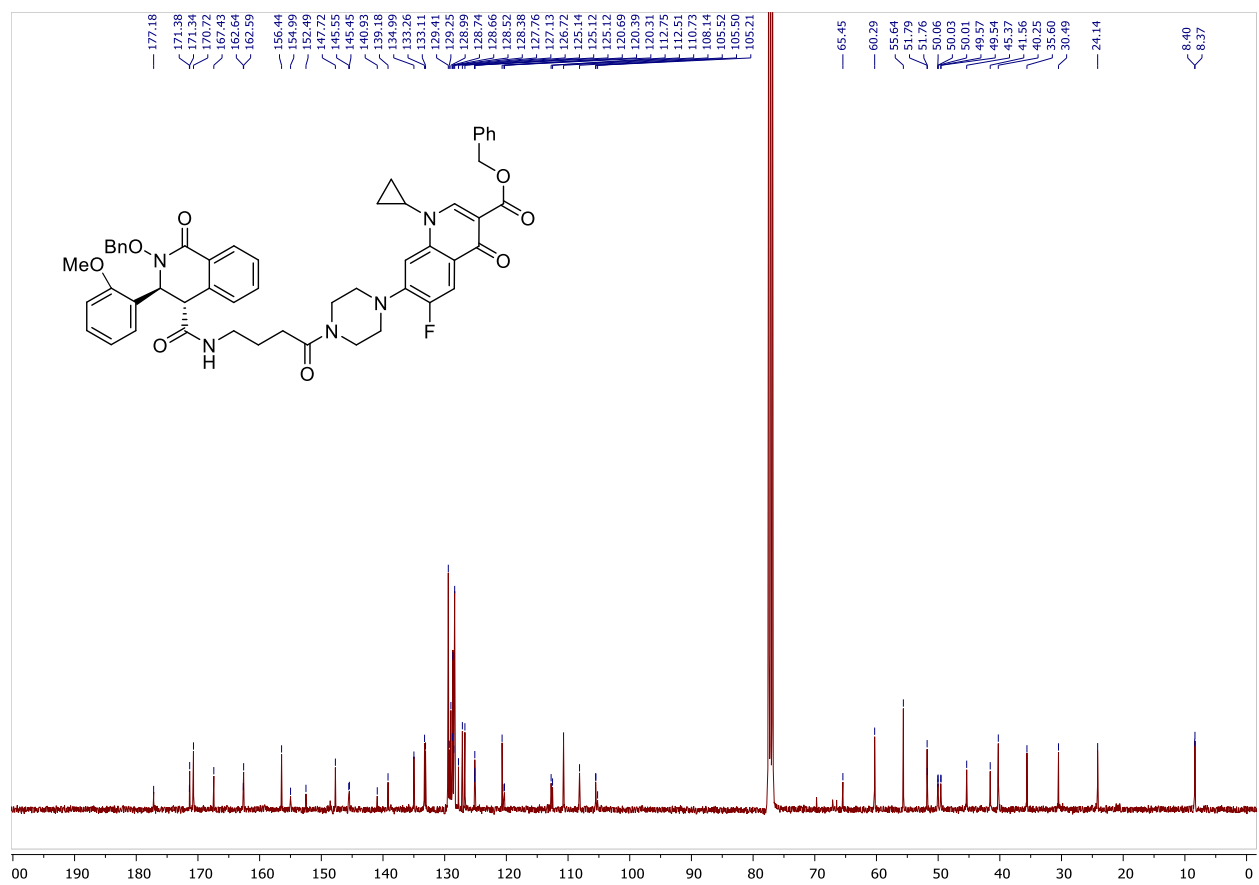

# <sup>1</sup>H and <sup>13</sup>C spectra of compound 7c

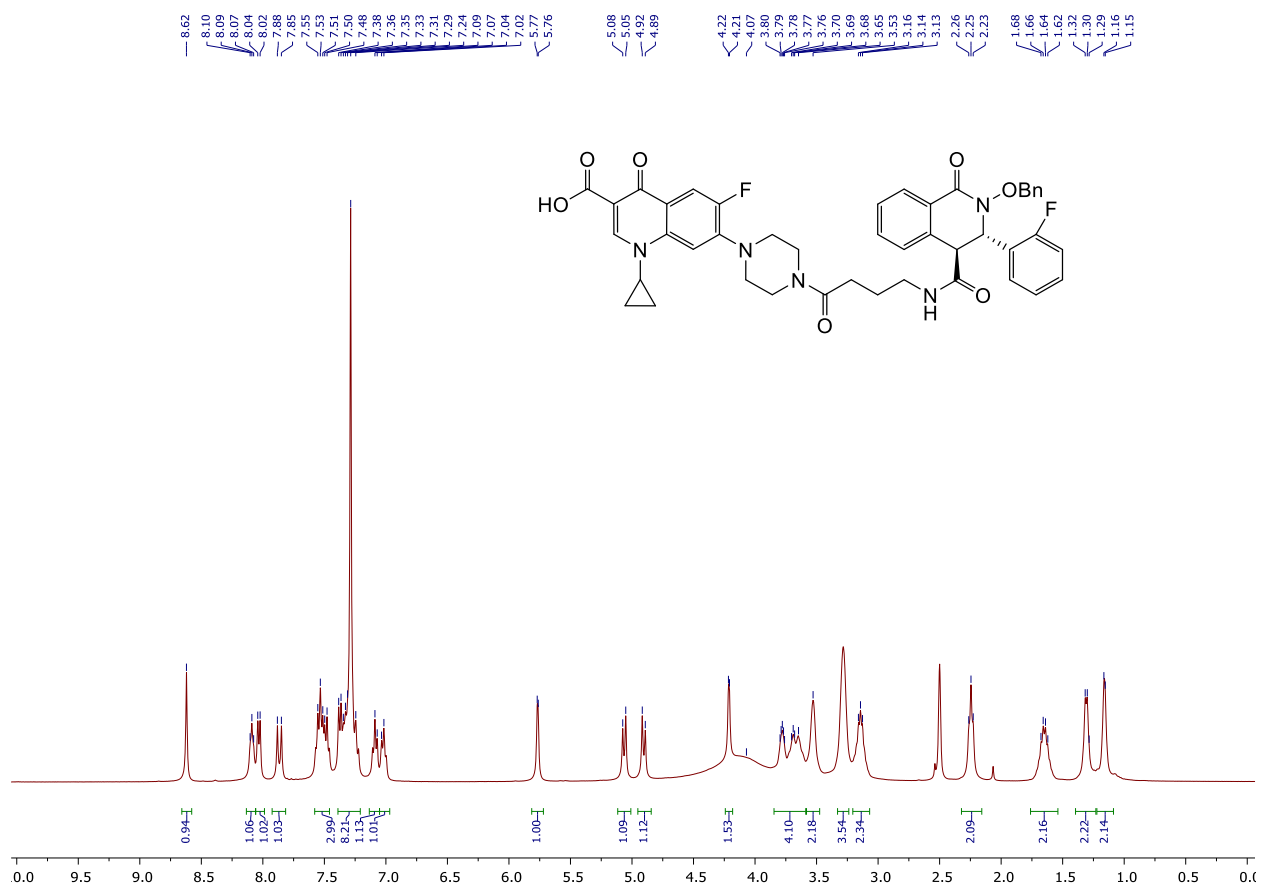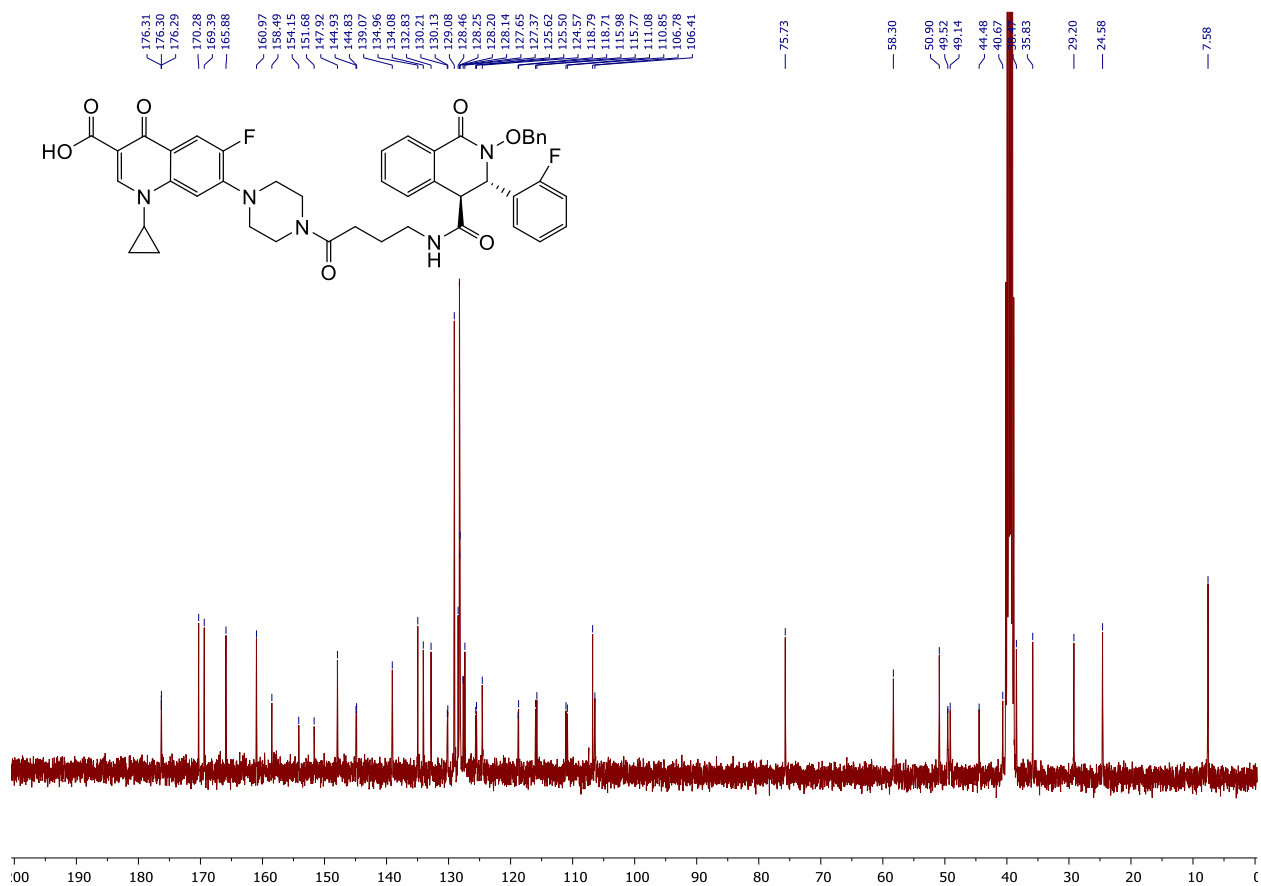

# <sup>1</sup>H and <sup>13</sup>C spectra of compound 8a

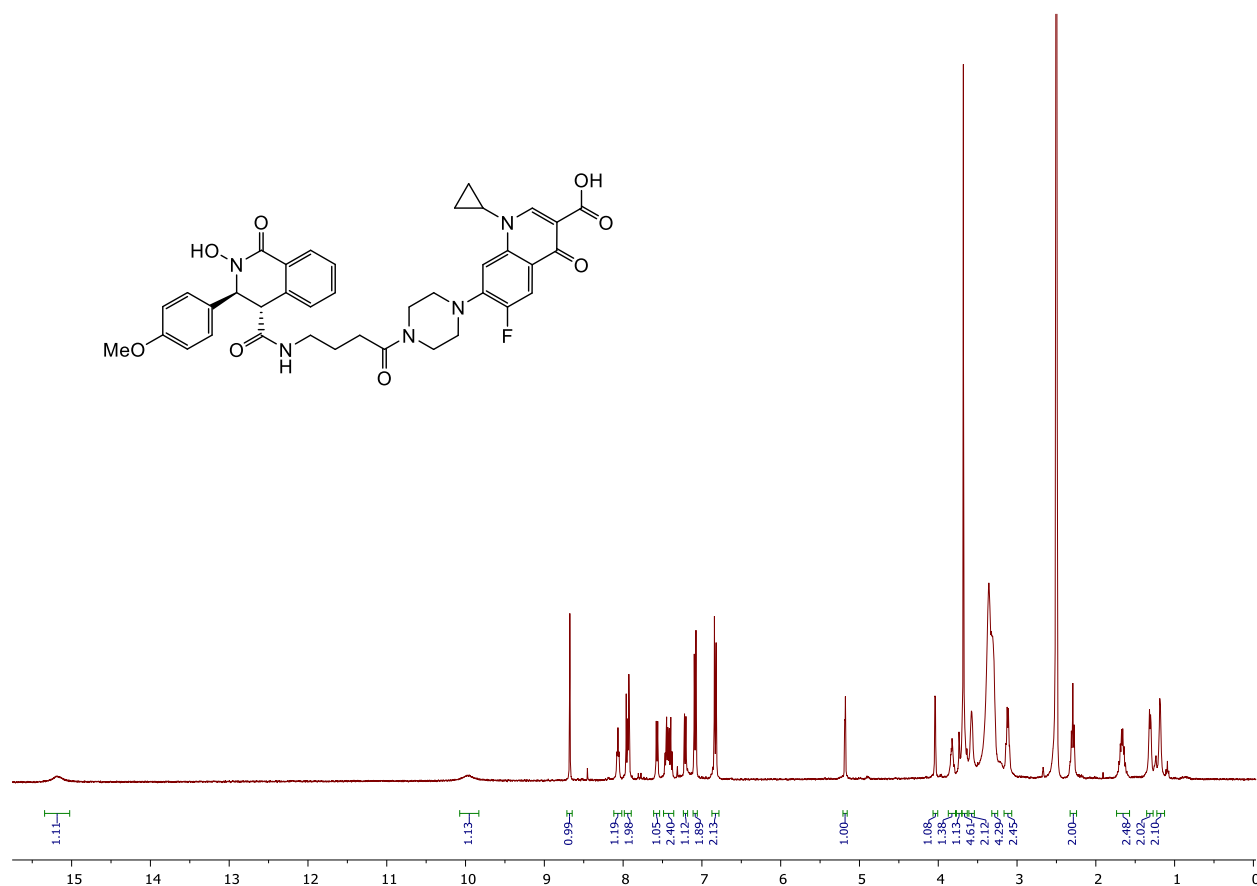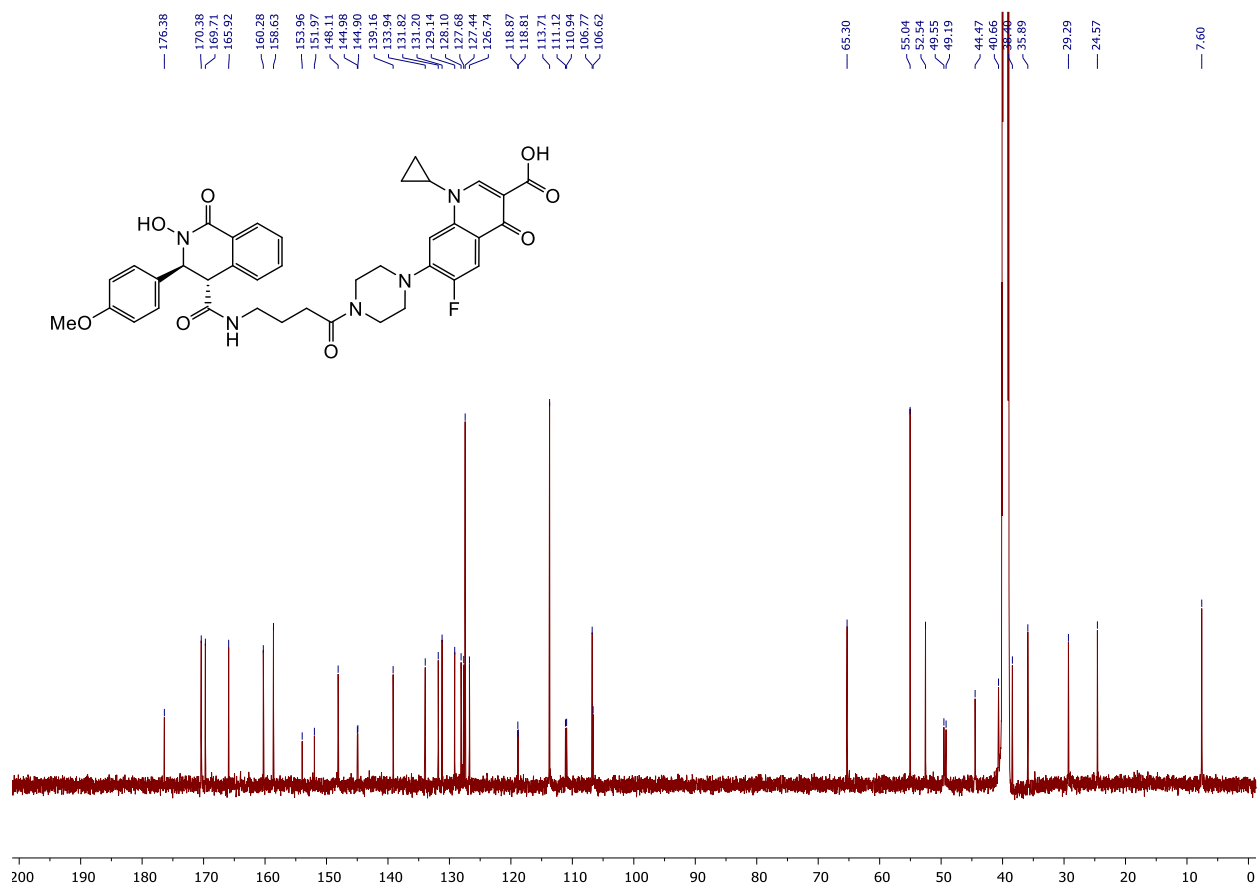

# <sup>1</sup>H and <sup>13</sup>C spectra of compound 8b

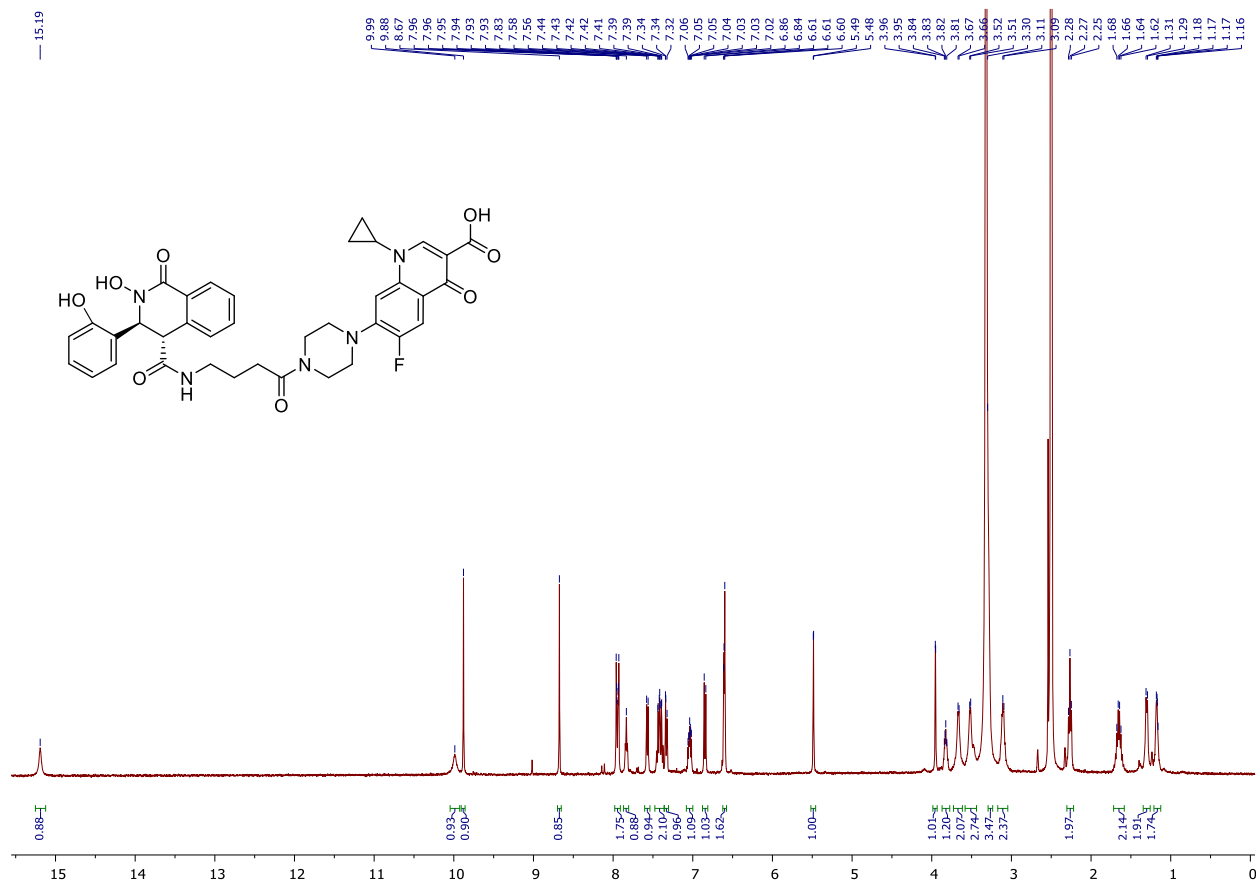

Chemical structure of compound 10 is shown above the spectrum. The structure is a complex molecule with a central piperazine ring connected to various functional groups including a carboxylic acid, a fluorine atom, a cyclopropyl group, a hydroxyl group, and a methoxy group.

<sup>1</sup>H NMR spectrum (DMSO-d<sub>6</sub>) of compound 10. The x-axis represents the chemical shift in ppm, ranging from 1.17 to 15.18. The spectrum shows several peaks, with integration values provided below the baseline.

Integration values (from left to right): 0.90, 0.94, 0.98, 2.12, 1.12, 1.11, 2.33, 1.11, 1.33, 1.16, 1.64, 1.04, 1.00, 1.24, 1.30, 1.30, 2.85, 3.26, 2.42, 2.13, 2.31, 2.07, 2.00.

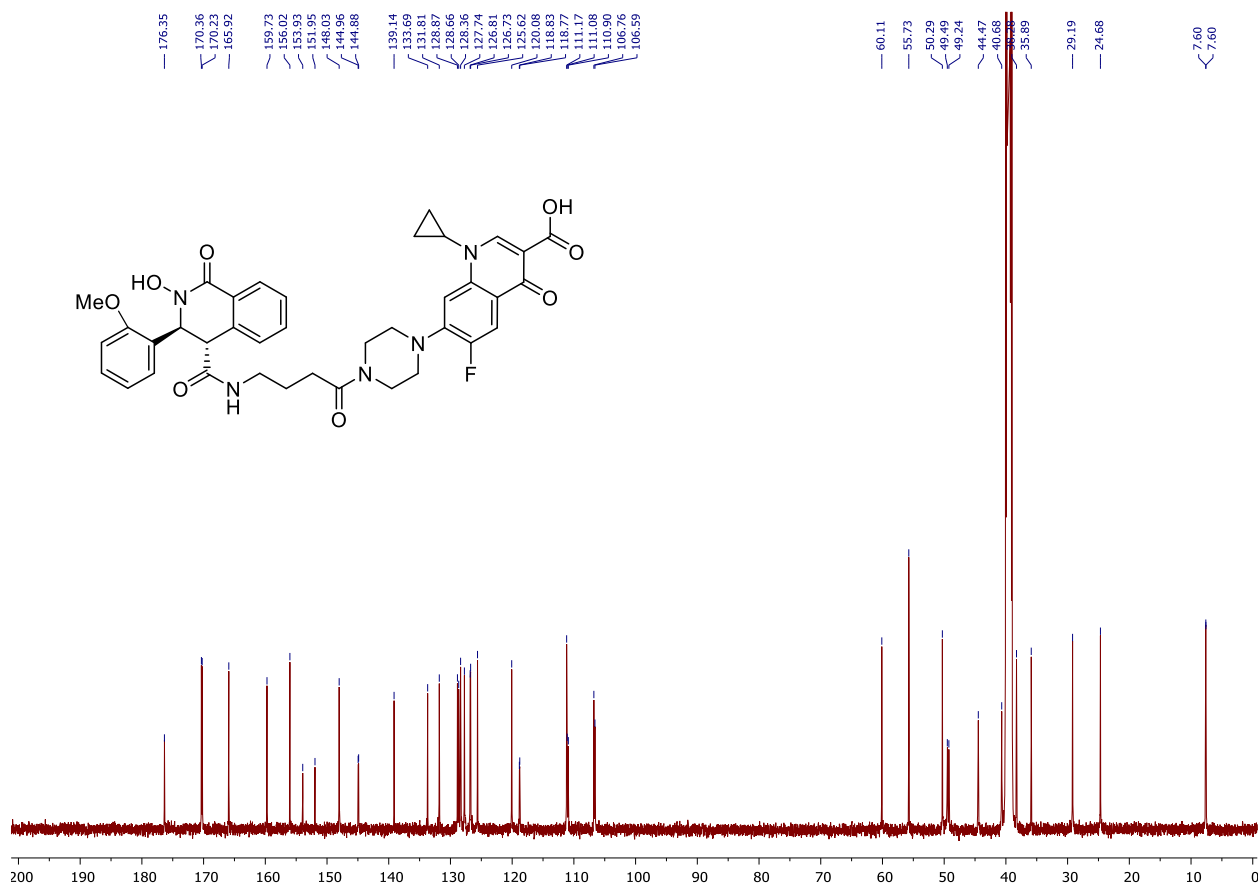

# <sup>1</sup>H and <sup>13</sup>C spectra of compound 8d

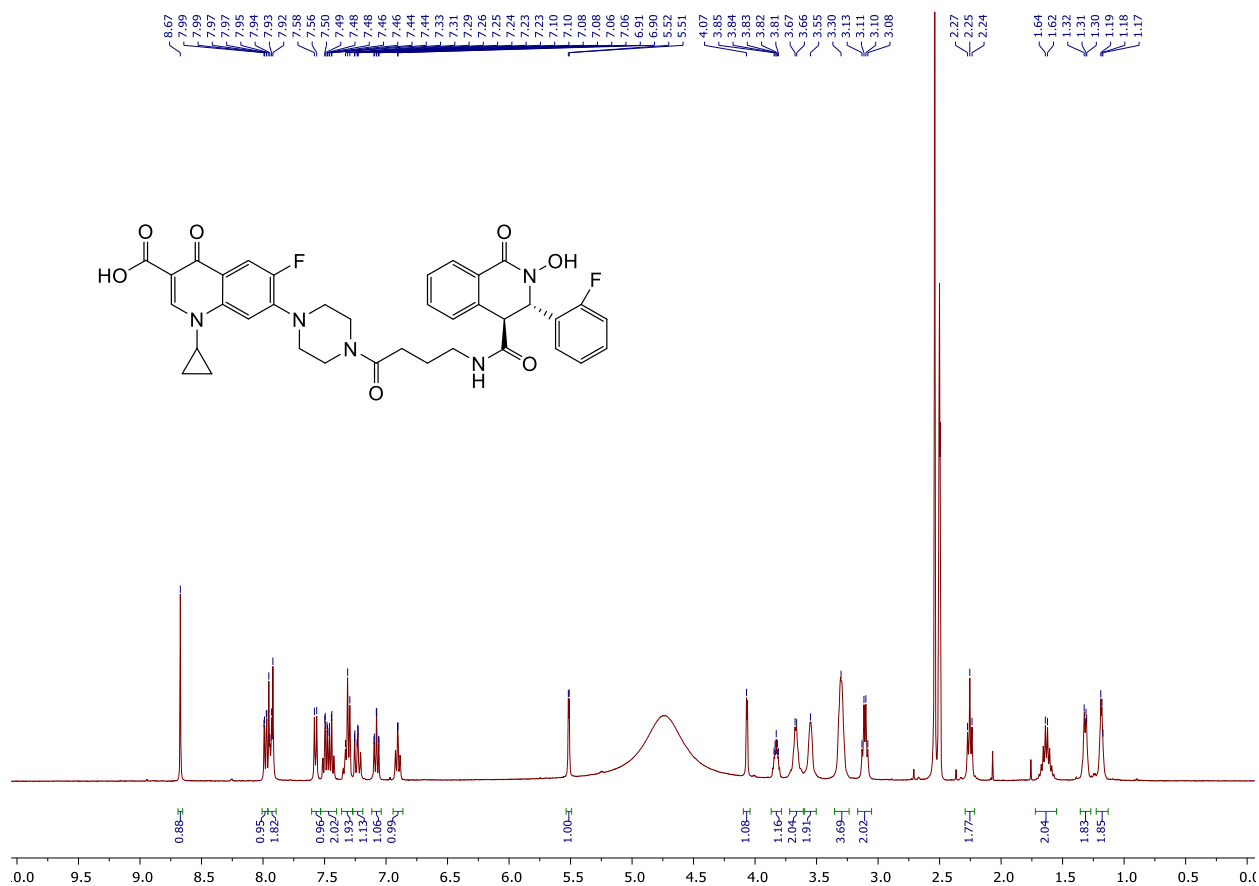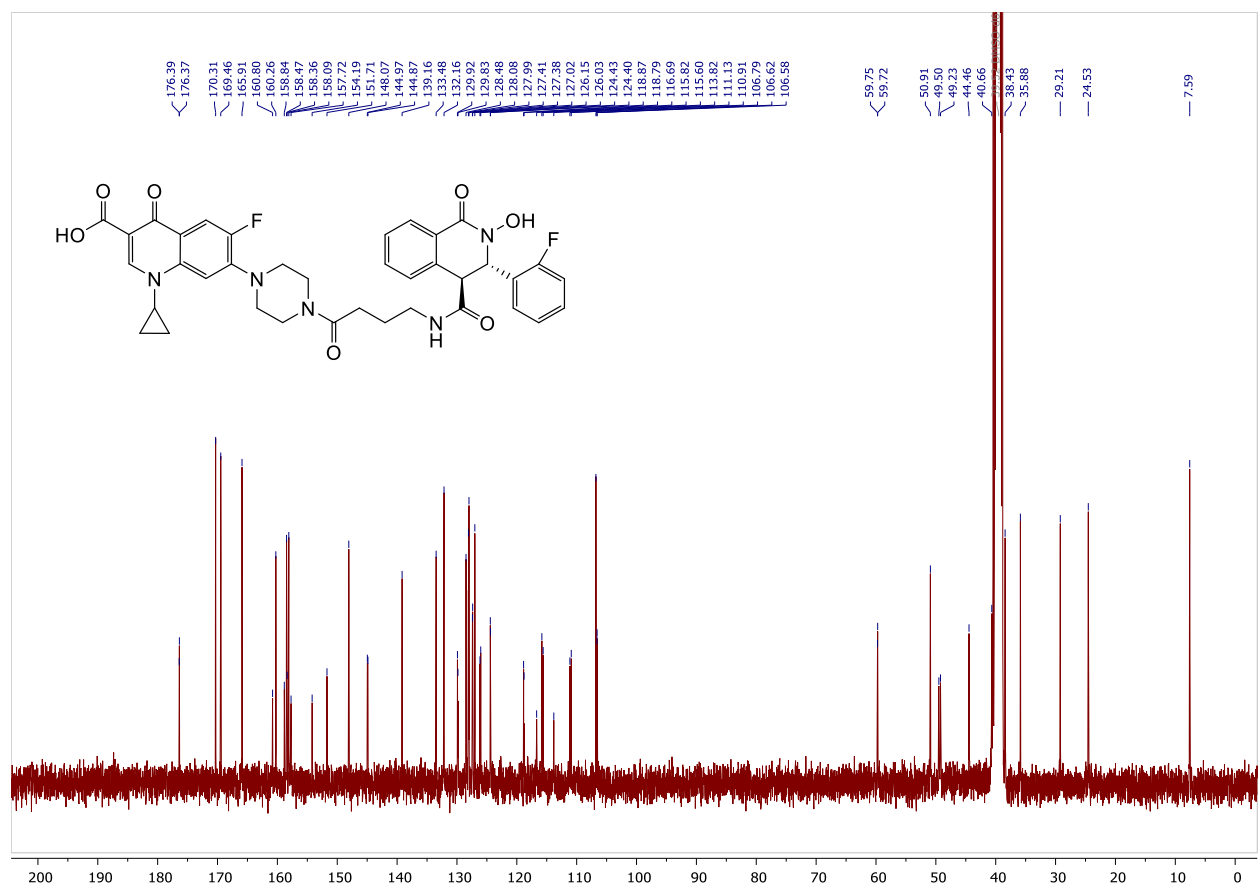

Structures of compounds **1a-z**

| Compound  | Structure                                                                           | Compound  | Structure                                                                             |
|-----------|-------------------------------------------------------------------------------------|-----------|---------------------------------------------------------------------------------------|
| <b>1a</b> | 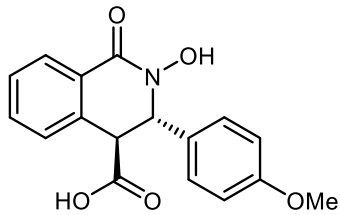   | <b>1n</b> |    |
| <b>1b</b> |    | <b>1o</b> |    |
| <b>1c</b> |    | <b>1p</b> |    |
| <b>1d</b> |   | <b>1q</b> |   |
| <b>1e</b> |  | <b>1r</b> |  |
| <b>1f</b> |  | <b>1s</b> |  |
| <b>1g</b> |  | <b>1t</b> |  |

|           |                                                                                     |           |                                                                                       |
|-----------|-------------------------------------------------------------------------------------|-----------|---------------------------------------------------------------------------------------|
| <b>1h</b> | 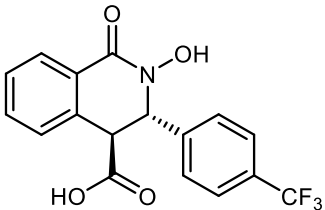   | <b>1u</b> |    |
| <b>1i</b> |    | <b>1v</b> |    |
| <b>1j</b> |    | <b>1w</b> |    |
| <b>1k</b> |   | <b>1x</b> |   |
| <b>1l</b> |  | <b>1y</b> |  |
| <b>1m</b> |  | <b>1z</b> |  |



**Figure S1.** Growth of  $\Delta pvdF\Delta pchA$  *P. aeruginosa* mutant in the absence or presence of 10  $\mu\text{M}$  and 100  $\mu\text{M}$  of the different compounds in iron-restricted medium. The growth medium used was CAA and growth was followed by monitoring optical density (OD) at 600 nm at 30 °C.

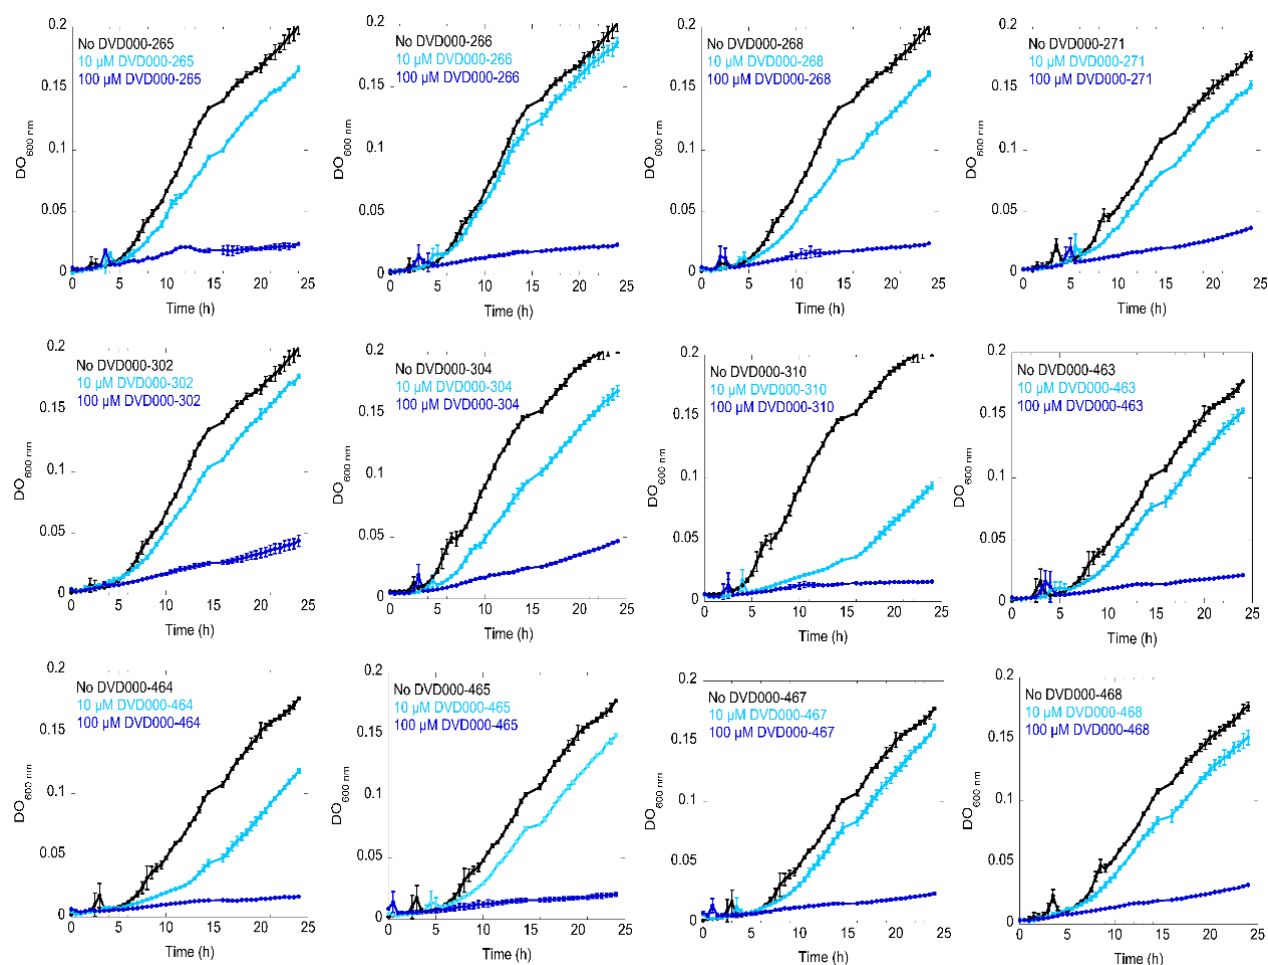

**Legend:** DVD000-265 (**1a**), DVD000-286 = DVD000-627 (**1c**), DVD000-268 (**1d**), DVD000-271 (**1z**), DVD000-302 (**1e**), DVD000-304 (**1i**), DVD000-310 (**1k**), DVD000-463 (**1t**), DVD000-464 (**1u**), DVD000-465 (**1v**), DVD000-467 (**1x**), DVD000-468 (**4**).
